the analyses, because these data were only available for a limited number of patients. Using these limited albuminuria and proteinuria data would have caused substantial selection bias. Second, not all creatinine values were measured by the same laboratory or by the same creatinine assay due to the design of the database, which collects data from practices throughout Flanders. However, all Belgian laboratories are subject to quality control measures ([http://www.iph.fgov.be/ClinBiol/bckb33/activities/external\\_quality/rapports/\\_down/klinische\\_chemie/2003/2\\_CHIMIE.pdf](http://www.iph.fgov.be/ClinBiol/bckb33/activities/external_quality/rapports/_down/klinische_chemie/2003/2_CHIMIE.pdf), 2009), which diminished the analytical differences among the laboratories. In the period between 1994 and 2008, most laboratories in Belgium used a kinetic Jaffe method without IDMS standardisation. Finally, we used the four variable MDRD equations for the estimation of the GFR. This equation is currently the most used equation but is originally [3] constructed in a population with renal diseases aged younger than 70 years and the number of studies validating this formula in patients aged 70 and over remains limited until now [8].

To conclude the prevalence of CKD in general practice increases with ageing but the prevalence of stages 4 and 5 CKD is limited, even in the oldest of the old. In the subgroup of patients aged 90 years and older more than 40% of the patients had an eGFR  $\geq 60$  ml/min. So a large group of patients show no decline or no clinically relevant decline in eGFR with ageing.

## Key points

- The prevalence of CKD increases with age.
- Despite the decline of the mean eGFR with ageing almost half of the oldest old has an eGFR  $>60$  ml/min.
- The prevalence of stages 4 and 5 CKD is limited, even in the oldest of the old.

## Funding

The Intego project is supported by the Government of Flanders and commissioned by its Minister responsible for Health Policy. G.V.P. is a fellow of the Research Foundation-Flanders (FWO).

GIJS VAN POTTTELBERGH<sup>1,\*</sup>, STEFAAN BARTHOLOMEUSEN<sup>1</sup>,  
FRANK BUNTINX<sup>1,2</sup>, JAN DEGRYSE<sup>1,3</sup>

<sup>1</sup>Department of General Practice, Katholieke Universiteit Leuven,  
Leuven, Belgium

<sup>2</sup>Research Institute Caphri, Maastricht University, Maastricht,  
The Netherlands

<sup>3</sup>Institut de Recherche Santé et Société (IRSS), Université Catholique  
de Louvain, Brussels, Belgium

Tel: (+32) 16 33 27 30; Fax: (+32) 16 33 74 80.

Email: [gijs.vanpottelbergh@med.kuleuven.be](mailto:gijs.vanpottelbergh@med.kuleuven.be)

\*To whom correspondence should be addressed

## References

1. Lindeman RD, Tobin J, Shock NW. Longitudinal studies on the rate of decline in renal function with age. *J Am Geriatr Soc* 1985; 33: 278–85.
2. Danziger RS, Tobin JD, Becker LC, Lakatta EE, Fleg JL. The age-associated decline in glomerular filtration in healthy normotensive volunteers. Lack of relationship to cardiovascular performance. *J Am Geriatr Soc* 1990; 38: 1127–32.
3. Levey AS, Greene T, Kusek J, Beck G. A simplified equation to predict glomerular filtration rate from serum creatinine [Abstract]. *J Am Soc Nephrol* 2000; 11: 155A.
4. Coresh J, Selvin E, Stevens LA, Manzi J, Kusek JW, Eggers P *et al.* Prevalence of chronic kidney disease in the United States. *JAMA* 2007; 298: 2038–47.
5. Cirillo M, Laurenzi M, Mancini M, Zanchetti A, Lombardi C, De Santo NG. Low glomerular filtration in the population: prevalence, associated disorders, and awareness. *Kidney Int* 2006; 70: 800–6.
6. Bartholomeeusen S, Truyers C, Buntinx F. *ziekten in de huisartsenpraktijk in Vlaanderen (1994–2008)*. Leuven, Belgium: ACCO, 2010.
7. Bartholomeeusen S, Kim CY, Mertens R, Faes C, Buntinx F. The denominator in general practice, a new approach from the Intego database. *Fam Pract* 2005; 22: 442–7.
8. Van Pottelbergh G, Van Heden L, Mathei C, Degryse J. Methods to evaluate renal function in elderly patients: a systematic literature review. *Age Ageing* 2010; 39: 542–8.

doi: 10.1093/ageing/afr154

Published electronically 2 December 2011

© The Author 2011. Published by Oxford University Press on behalf of the British Geriatrics Society. All rights reserved. For Permissions, please email: [journals.permissions@oup.com](mailto:journals.permissions@oup.com)

## Extended-spectrum beta-lactamase-producing *Enterobacteriaceae*: unexpected low prevalence of carriage in elderly French residents

SIR—Extended-spectrum  $\beta$ -lactamases (ESBLs) are the major cause of resistance to cephalosporins. Since 2000, CTX-M enzymes have become the most prevalent, particularly in *Escherichia coli* [1, 2]. CTX-M-15-producing *E. coli* of the ST131 lineage has become endemic worldwide [3, 4]. The epidemiology of ESBL-producing *Enterobacteriaceae* (ESBLE) is complex, involving spread in the community, nosocomial acquisition and plasmid transfer between *Enterobacteriaceae*. It has been suggested that nursing homes (NHs) and long-term care facilities (LTCFs) may be significant to the epidemiology of ESBLE [5–8]. Elderly patients cumulate risk factors for carriage of multidrug-resistant (MDR) bacteria and residents have been recently shown to be reservoirs of ESBLE [9, 10]. A group of experts appointed by the French Ministry of Health to establish suggestions to tackle ESBLE recently recommended monitoring the

## Research letters

prevalence of ESBLE carriage in elderly patients by rectal or urinary screening [11].

To increase our knowledge concerning the epidemiology of ESBLE carriage and associated risk factors in elderly French residents of care facilities, we conducted a multicentre point-prevalence study. In particular, we evaluated colonisation of residents at 40 institutions in two distant French regions.

## Methods

### Study population

Three LTCFs in the Franche-Comté region (LTCF-A: 150 beds, LTCF-B: 254 beds, LTCF-T: 143 beds)—, and 37 NHs in the centre region (NH-01 to NH-37 with 40–307 beds per NH, total beds 5,141) participated in the study. All the residents at the participating institutions between February and June 2010 were eligible for recruitment into the study. The residents of one of the units of LTCF-A and all residents at LTCF-B and LTCF-T were enrolled. More than one of every five NH residents was randomly selected for participation. All residents or their relatives were individually approached for consent to access their medical records and to culture a single sample (either faecal or urine) to test for ESBLE.

### Study design

The study was carried-out over a 4-month period. Each patient was included only once. Microbiological samples were collected from all residents included; two different approaches were used to investigate ESBLE carriage. LTCF residents were screened for ESBLE carriage with rectal swabbing. Swabs were suspended in 0.5 ml of sterile water and 0.1 ml of the suspension was streaked on Drigalski agar (Bio-Rad, Marnes-la-Coquette, France). A 20 µg cefotaxim disk (Bio-Rad, Marnes-la-Coquette, France) was then applied, and the plated incubated for 18 h at 35°C. Bacteria growing around the cefotaxim disk were identified and tested for ESBL production using the double disk synergy test according to the recommendations of the Antibioqram Committee of the French Society for Microbiology [12]. Urine samples from NH residents were used for screening for ESBLE carriage. Ten microlitre samples of the first morning urine were plated within 1 h of collection on a ChromID ESBL selective agar plate (bioMérieux, Marcy l'Etoile, France), and the plates were incubated at 37°C for 48 h. Bacteria forming colonies were identified using Vitek<sup>®</sup>2 Gram-negative Identification Cards (bioMérieux, Marcy l'Etoile, France) and studied for ESBL production as described above.

### Data collection

Data were collected in a standardised questionnaire and included demographic data (age and sex), physical disability,

urinary and faecal incontinence and significant comorbidities (diabetes mellitus, renal disease, chronic renal insufficiency). Various risk factors for ESBLE carriage were also recorded: hospitalisation and antibiotic use (cephalosporin and fluoroquinolones) within the 6 months prior to inclusion in the study.

### Statistical analysis

All variables were examined by univariable analysis using the  $\chi^2$  or Fisher's exact test, as appropriate. All statistical tests were two-tailed.  $P < 0.05$  was considered to be statistically significant. Epi info software, version 6, was used for statistical analysis.

### Confidentiality and ethical aspects

This prevalence study was run in accordance with the French healthcare recommendations for prevention of infection, as an inter-regional study and as such did not require ethical approval. It was managed jointly with the heads of all participating institutions and the physicians responsible for caring for the residents.

## Results

Eight-hundred and seventy-seven residents (412 from LTCFs, 465 from NHs) were enrolled, including 621 women (70.8%) and 256 men (29.2%) aged between 49 and 108 years (mean 84; SD 9). Most characteristics were similar for the two populations (see Supplementary data available in *Age and Ageing* online, Appendix 1). LTCF and NH residents did not differ for age, physical disability, incontinence, diabetes mellitus, recent antibiotic use or recent urinary catheterisation. The only significant differences were the proportion of men (22% for LTCF versus 37% for NHs;  $P < 0.001$ ), and the incidences of urinary pathology (6% for LTCFs versus 12% for NHs;  $P = 0.002$ ) and recent hospitalisation (31% for LTCFs versus 22% for NHs;  $P = 0.003$ ).

Seventeen of the 877 enrolled residents were ESBLE carriers (1.9%): 11 of the 412 (2.7%) LTCF residents and six of 465 (1.3%) NH residents. Carriage rates obtained by faecal or urine screening did not differ significantly ( $P = 0.209$ ). The 17 ESBLE isolates were 10 *E. coli*, three *Enterobacter cloacae*, two *Klebsiella pneumoniae*, one *Proteus mirabilis* and one *Citrobacter koseri*. Most of these strains were resistant to fluoroquinolones (14/17, 82%) and to trimethoprim-sulfamethoxazole (10/17, 59%); all were susceptible to carbapenems.

ESBLE carriers were significantly older and in a poorer state of health than non-carriers ( $P = 0.011$ ) (Table 1). ESBLE colonisation was significantly associated with urinary and/or faecal incontinence ( $P = 0.049$ ), recent urinary catheterisation ( $P = 0.021$ ) and antibiotic treatment ( $P = 0.002$ ). Our data showed that if the residents were

**Table 1.** Demographic and clinical characteristics of residents positive for ESBLE carriage ( $n = 17$ ) and those who were not ( $n = 860$ ) in the three LTCFs and the 37 NHs

| Characteristics of residents             | Positive, $n$ (%) | Negative, $n$ (%) | $P$ -value |
|------------------------------------------|-------------------|-------------------|------------|
| Male sex                                 | 7 (43.7)          | 256 (29.7)        | NS         |
| Age > 85 years                           | 12 (70.6)         | 489 (56.9)        | NS         |
| Physical disability                      | 11 (68.7)         | 301 (35.0)        | 0.011      |
| Co-morbidities                           |                   |                   |            |
| Diabetes mellitus                        | 1 (6.2)           | 152 (17.6)        | NS         |
| Urinary pathology                        | 3 (18.7)          | 74 (8.6)          | NS         |
| Incontinence urinary and/or faecal       | 12 (70.6)         | 400 (46.5)        | 0.049      |
| Urinary catheter in the previous 7 days  | 3 (18.7)          | 29 (3.4)          | 0.021      |
| Hospitalisation in the previous 6 months | 5 (31.2)          | 223 (25.9)        | NS         |
| Antibiotic use in the previous 6 months  | 11 (68.8)         | 295 (34.3)        | 0.002      |
| Cephalosporins                           | 4 (25)            | 73 (8.5)          | NS         |
| Fluoroquinolones                         | 2 (12.5)          | 43 (5.0)          | NS         |

**Table 2.** Performance of ESBLE carriage detection according to the number of risk factors and risk score (results for faecal and urine swabs)

| Number of risk factors <sup>a</sup> | Score (cumulated number of risk factors) <sup>a</sup> |                   | Sensitivity | Residents to be screened |
|-------------------------------------|-------------------------------------------------------|-------------------|-------------|--------------------------|
|                                     | Carriers, $n$                                         | Non-carriers, $n$ |             |                          |
| <b>ESBL faecal</b>                  |                                                       |                   |             |                          |
| 0                                   | 0                                                     | 102               | ≥ 0         | 100% (11/11)             |
| 1                                   | 4                                                     | 154               | ≥ 1         | 100% (11/11)             |
| 2                                   | 2                                                     | 110               | ≥ 2         | 64% (7/11)               |
| 3                                   | 4                                                     | 35                | ≥ 3         | 45% (5/11)               |
| 4                                   | 1                                                     | 0                 | 4           | 9% (1/11)                |
| <b>ESBL urine</b>                   |                                                       |                   |             |                          |
| 0                                   | 0                                                     | 156               | ≥ 0         | 100% (6/6)               |
| 1                                   | 1                                                     | 134               | ≥ 1         | 100% (6/6)               |
| 2                                   | 2                                                     | 101               | ≥ 2         | 83% (5/6)                |
| 3                                   | 2                                                     | 61                | ≥ 3         | 50% (3/6)                |
| 4                                   | 1                                                     | 7                 | 4           | 17% (1/6)                |

<sup>a</sup>Risk factors considered: physical disability, urinary and/or faecal incontinence, urinary catheter in the previous 7 days, antibiotic use in the previous 6 months.

stratified according to the number of these four risk factors they present, screening the one-third of all residents with at least two of the four risk factors would identify a large proportion of carriers (64% and 83% by faecal and urine screening, respectively; Table 2).

## Discussion

Data on ESBLE carriage among LTCF and NH residents remain scarce despite these settings being frequently cited as potential reservoirs for these MDR bacteria [5, 6, 8, 9].

Recently, ESBLE carriage was assessed using diverse study designs in various patient populations [5, 7–9, 13–17]. Carriage rates varied from 5.5% for ambulatory patients in Spain [16] and 8% for patients at admission [17] to 40.5% for NH residents in Northern Ireland [9]. Our study revealed a lower ESBLE carriage among residents. The rate observed (1.9%) was close to that found by nationwide surveillance in France in 2006 in a community setting (1.1%) [18, 19]; note that the prevalence of ESBLE increased constantly in France between 2006 and 2010 [13].

One possible explanation of the low prevalence we report is poor sensitivity of our carriage detection procedure. Although we used established ESBLE detection procedures routinely applied in our university hospitals [11, 12], each subject was only tested once at only one colonisation site; most authors test multiple sites [8].

Consistently with previous studies [1, 13, 16, 17], the ESBLE we isolated were mostly *E. coli* and mostly resistant to multiple antibiotic classes, especially fluoroquinolones.

The low carriage rate of ESBLE observed here among elderly patients at French NHs and LTCFs could evolve rapidly. In the context of substantial concerns about the spread of MDR bacteria, local, regional, nationwide and worldwide survey studies should be routinely conducted to monitor the phenomenon and to provide information for adapting educational preventive strategies in these settings. Our findings indicate that a carriage detection strategy using urine and/or faecal swabs from residents presenting at least two of the four identified risk factors appears to allow detection of a large proportion of ESBLE carriers. This observation may be used as the basis for an easy and low cost approach to optimise ESBLE control.

Asymptomatic carriage of ESBLE is an important risk factor for the development of outbreaks involving resident-to-resident transmission. Knowledge about the clinical data associated with ESBLE carriage may facilitate identification of residents at risk and the development of preventive strategies to restrict the dissemination of ESBLE and the progress of outbreaks in NHs. Our study confirmed that many residents carrying ESBLE presented numerous major co-morbidities and well-established potential risk factors, such as prior antibiotic exposure, urinary catheterisation and prior hospitalisation [7–9, 15, 17, 20, 21]. Unfortunately, these co-morbidities and risk factors are frequent and often severe among residents. Nevertheless, our findings indicate that ESBLE carriage was most frequent among the oldest residents and those presenting the greatest disabilities. As transient carriage on the hands of healthcare workers is a route of transfer from patient-to-patient, we stress the need for stringent infection-control precautions for the most dependent residents. In particular, a high level of compliance with standard precautions should be obligatory, focusing on urinary management and the manipulation of used absorbent products employed for containing faecal and urinary incontinence.

## Conclusion

In the community, ESBLE carriage ranges from 0.6 [19] to 3.7% [16], but can be much more prevalent during outbreaks [7, 8, 22]. To our knowledge, no large-scale surveillance data are yet available concerning elderly populations in Europe. The carriage rates we report for LTCF and NH residents were very similar and close to that in the general population [15, 18, 19]. Our results suggest that the French NHs and LTCFs studied are unlikely to be major reservoirs for ESBLE.

## Key points

- Three long-term-care facilities and 37 nursing homes.
- 877 residents screened for ESBLE carriage.
- Low prevalence rate (1.9%).
- Four risk factors associated with ESBLE carriage.
- Strategy for ESBLE detection at residents into long-term care facilities and nursing homes.

## Supplementary data

Supplementary data mentioned in the text is available to subscribers in *Age and Ageing* online.

## Acknowledgements

Participating physicians and nurses: P. AMIRAULT (Vierzon), M. AUDIBERT (Gien), V. BACLE (Richelieu), B. BAUDRON (Montoire sur le Loir), M. BEAUBAIS (Chateauroux), F. BERJAMY (Avanne) J. BLEUET (Luyes), M. BOUCHER (Chateaudun), M. BOULANGER (Chateaudun), N. BOURSIER (Nogent le Rotrou), L. BUCQUET (Orléans), P. CADIC (Meung sur Loire), B. CATTIER (Amboise), J. CELOTTO (Besançon), P. CHEMIN (Nogent le Rotrou), I. CHENU (Loches), I. CLOAREC (Sainte Maure de Touraine), G. COUROUBLE (Chateauroux), MC COURTIN (Amboise), Y. CRETON (Valencay), G. DELAPORTE (Gien), C. DENIS (Loches), F. DEPERROIS (Chinon), P. DEPERSON (Sully sur Loire), R. DEREUX (Richelieu), MC . DES GARETS (La Chatre), B. DONCE (Beaugency), P. DURAND (Saint Aignan sur Cher), P. FOLOPPE (Loches), I. FRAISSE (Notre Dame d'Oé), P. GARNIER (Abilly), F. GAUCHER (Sancerre), F. GROBOST (La Ferté Bernard), F. GUILLEMONT (Beaune la Rolande), M. HETROY (Ligueil), M. IEHL-ROBERT (Besançon), D. IMBAULT (Vendome), J. ISHAC (Vendome), A. JACQUINOT (Villeloin Coulangé), M. JOLLIVET (Beaugency), S. JOUANNEAU (Saint Aignan sur Cher), E. KOFFY (Aigurande), MJ. KOURTA (Chateaudun), C. LABOUTE (Montoire sur le Loir), F. LAUBUS (Buzancais), P. LAUDAT (Tours), P. LEFEBVRE (Gien), O. LEHIANI (Vierzon), H. LEMAITRE (Tours), A. LEMORE (Montoire sur le Loir), C. LEROY (Romorantin-Lanthenay), AC.

LLOVERAS (Meung sur Loire), J. LOCQUET (Sainte Maure de Touraine), AM. LONGEAUD (Levroux), D. LOPEZ (Sully sur Loire), D. LYON (Pruilly sur Claise), S. MAINTIER (Montoire sur le Loir), MA. MAUBERGER (Chinon), A. MEDALLEL (Orléans), V. MENU (Dry), C. MERCUSOT (Olivet), F. MORVAN (La Chatre), S. NAVARRO (Sully sur Loire), M. PARENT (Tours), I. PEFFERT (Beaugency), C. POIREAU (Sainte Maure de Touraine), D. POITVIN (Beaumont en Véron), M. POPINEAU (Gracay), X. POURRAT (Tours), M. PREVOST-OUSSAR (Beaune la Rolande), B. PRON (Cosne sur Loire), C. QUERRIEN (Vendome), P. RIVIERE (Amboise), B. ROUSSEAU (Gien), A. SEVERIN (Vierzon), B. SINZELLE (Selles sur Cher), E. TAILLEMITE (Olivet), S. TELMINI (Sancerre), A. THERMY (Montoire sur le Loir), MF THERON le GARGASSON (Chateauroux), A. THOMAS (Saint Aignan sur Cher), R. VERGEZ-PASCAL (Chartres), L. VILLAIN (Beaune la Rolande), S. WAITT (Chinon).

## Funding

This work was supported by the Agence Régionale de Santé of the region Centre, the Centre Hospitalier Universitaire of Tours, France, the *Centre de Coordination de la Lutte contre les Infections Nosocomiales de l'Ouest* and the Centre Hospitalier Universitaire of Besançon, France.

XAVIER BERTRAND<sup>1</sup>, MARLÈNE AMARA<sup>2</sup>, MARLÈNE SAUGET<sup>1</sup>,  
MARIE-CAROLINE CLÉMENT<sup>1</sup>, DANIEL TALON<sup>1</sup>,  
ANNE-SOPHIE DOMELIER-VALENTIN<sup>2</sup>, ROLAND QUENTIN<sup>2</sup>,  
NATHALIE VAN DER MEE-MARQUET<sup>2,3,\*</sup>, for the Réseau des  
Hygiénistes du Centre

<sup>1</sup>Service d'Hygiène Hospitalière Centre Hospitalier Universitaire,  
Besançon, France

<sup>2</sup>Service de Bactériologie et Hygiène, Centre Hospitalier  
Universitaire, Tours, France

<sup>3</sup>Réseau des Hygiéniste du Centre, Centre Hospitalier Universitaire,  
Tours, France

Tel: (+33) 234 389 430; Fax: (+33) 247 478 588.

Email: n.vandermee@chu-tours.fr

\*To whom correspondence should be addressed.

## References

1. Paterson D, Bonomo R. Extended-spectrum beta-lactamases: a clinical update. *Clin Microbiol Rev* 2005; 18: 657–86.
2. Nicolas-Chanoine M, Blanco J, Leflon-Guibout V *et al*. Intercontinental emergence of *E. coli* clone O25:H4-ST131 producing CTX-M-15. *J Antimicrob Chemother* 2008; 61: 273–81.
3. Leflon-Guibout V, Jurand C, Bonacorsi S *et al*. Emergence and spread of three clonally related virulent isolates of CTX-M-15-producing *E. coli* with variable resistance to aminoglycosides and tetracycline in a French geriatric hospital. *Antimicrob Agents Chemother* 2004; 48: 3736–42.
4. Oteo J, Navarro C, Cercenado E *et al*. Spread of *E. coli* strains with high-level cefotaxime and ceftazidime resistance between

- the community, long-term care facilities, and hospital institutions. *J Clin Microbiol* 2006; 44: 2359–66.
5. Dhanji H, Doumith M, Rooney PJ *et al.* Molecular epidemiology of fluoroquinolone-resistant ST131 *E. coli* producing CTX-M extended-spectrum B-lactamases in nursing homes in Belfast, UK. *J Antimicrob Chemother* 2011; 66: 297–303.
  6. Nicolas-Chanoine MH, Jarlier V, La Collégiale de Bactériologie-Virologie-Hygiène Hospitalière de l'Assistance Publique, Hôpitaux de Paris, France. Extended-spectrum beta-lactamases in long-term-care facilities. *Clin Microbiol Infect* 2008; 14: 111–6.
  7. Mendelson G, Hait V, Ben-Israel J *et al.* Prevalence and risk factors of extended-spectrum beta-lactamase-producing *E. coli* and *K. pneumoniae* in an Israeli long-term care facility. *Eur J Clin Microbiol Infect Dis* 2005; 24: 17–22.
  8. March A, Aschbacher R, Dhanji H *et al.* Colonization of residents and staff of a long-term-care facility and adjacent acute-care hospital geriatric unit by multiresistant bacteria. *Clin Microbiol Infect* 2010; 16: 934–44.
  9. Rooney PJ, O'Leary MC, Loughrey AC *et al.* Nursing homes as a reservoir of ESBL-producing ciprofloxacin-resistant *E. coli*. *J Antimicrob Chemother* 2009; 64: 635–41.
  10. van der Mee-Marquet N, Savoyen P, Domelier-Valentin AS *et al.* CTX-M-type fluoroquinolone-resistant *E. coli*: analysis of the colonization of residents and inanimate surfaces 1 Year after a first case of urinary tract infection at a nursing home in France. *Infect Control Hosp Epidemiol* 2010; 31: 968–70.
  11. Haut Conseil de santé Publique. Commission spécialisée Sécurité des patients : infections nosocomiales et autres événements indésirables liés aux soins et aux pratiques. Recommandations relatives aux mesures à mettre en oeuvre pour prévenir l'émergence des entérobactéries BLSE et lutter contre leur dissémination. Report 2010. [www.hcsp.fr/explore.cgi/hcsp20100202\\_enterobactBLSE.pdf](http://www.hcsp.fr/explore.cgi/hcsp20100202_enterobactBLSE.pdf).
  12. Anonymous. Comité de l'Antibiogramme de la Société Française de Microbiologie. Report 2010; 26–29. [http://www.sfm-microbiologie.org/pages/?page=746&id\\_page=182](http://www.sfm-microbiologie.org/pages/?page=746&id_page=182).
  13. Janvier F, Merens A, Delaune D *et al.* Fecal carriage of third generation cephalosporins resistant *Enterobacteriaceae* in asymptomatic young adults: evolution between 1999 and 2009. *Pathol Biol (Paris)* 2011; 59: 97–101.
  14. Woerther PL, Angebault C, Lescat M *et al.* Emergence and dissemination of ESBL-producing *E. coli* in the community: lessons from the study of a remote and controlled population. *J Infect Dis* 2010; 202: 515–23.
  15. Calbo E, Romani V, Xercavins M *et al.* Risk factors for community-onset urinary tract infections due to *E. coli* harbouring extended-spectrum B-lactamases. *J Antimicrob Chemother* 2006; 57: 780–3.
  16. Valverde A, Coque TM, Sánchez-Moreno MP *et al.* Dramatic increase in prevalence of fecal carriage of ESBL-producing *Enterobacteriaceae* during nonoutbreak situations in Spain. *J Clin Microbiol* 2004; 42: 4769–75.
  17. Friedmann R, Raveh D, Zartzer E *et al.* Prospective evaluation of colonization with ESBL-producing *Enterobacteriaceae* among patients at hospital admission and a subsequent colonization with ESBL-producing *Enterobacteriaceae* among patients during hospitalization. *Infect Contr Hosp Epidemiol* 2009; 30: 534–42.
  18. Arpin C, Quentin C, Grobost F *et al.* Nationwide survey of ESBL-producing *Enterobacteriaceae* in the French community setting. *J Antimicrob Chemother* 2009; 63: 1205–14.
  19. Leflon-Guibout V, Blanco J, Amaqdouf K *et al.* Absence of CTX-M-enzymes but high prevalence of clones, including ST131, among fecal *E. coli* isolates from healthy subjects living in the area of Paris, France. *J Clin Microbiol* 2008; 46: 3900–5.
  20. Lindback H, Lindback J, Sylvan S *et al.* Low frequency of antibiotic resistance among urine isolates of *E. coli* in the community, despite a major hospital outbreak with *K. pneumoniae* producing CTX-M-15 in Uppsala county. *Scand J Infect Dis* 2010; 42: 243–8.
  21. Esposito S, Capuano A, Noviello S *et al.* Modification of patients' endogenous bacterial flora during hospitalization in a large teaching hospital in Naples. *J Chemother* 2003; 15: 568–73.
  22. Wiener J, Quinn JP, Bradford PA *et al.* Multiple antibiotic-resistant *Klebsiella* and *E. coli* in nursing homes. *JAMA* 1999; 281: 517–23.

doi: 10.1093/ageing/afr173

© The Author 2012. Published by Oxford University Press on behalf of the British Geriatrics Society. All rights reserved. For Permissions, please email: [journals.permissions@oup.com](mailto:journals.permissions@oup.com)

### Physical performance, sarcopenia and respiratory function in older patients with chronic obstructive pulmonary disease

SIR—The aging process is characterised by a progressive decline of skeletal muscle (or sarcopenia) which, by closely interacting with chronic diseases, may predispose to the onset of physical disability [1]. Chronic obstructive pulmonary disease (COPD) is a highly prevalent condition associated with both depleted lean mass and impaired overall health status in older persons [2, 3]. Furthermore, lean mass has shown to be inversely associated with the Medical Research Council dyspnoea score [4] and the Activity component of the Saint George Respiratory Questionnaire [5], and directly related to pulmonary function parameters (including Forced Expiratory Volume in 1 second [FEV1]) [4].

Recently, Spruit *et al.* [6] reported the absence of relationship between fat-free mass and 6-minute walking test (6mWT) results in the Evaluation of COPD Longitudinally to Identify Predictive Surrogate Endpoints (ECLIPSE) study. On the other hand, Ischaki *et al.* [4] previously reported a positive correlation between results at the 6mWT (the most commonly adopted and reliable physical performance measure in COPD [7]) and fat-free mass. The ECLIPSE investigators [6] explained their negative results by their analytical choices and the evaluation of a higher number of potential confounders.

To our knowledge, besides of these sparse data, the relationships existing among respiratory function, sarcopenia and physical performance have never been formally
